# Supplementary material for: Ketogenic diet ameliorates attention deficit hyperactivity disorder in rats via regulating gut microbiota
Source: PubMed Central journal article supplement (PMC10431618; doi:10.1371/journal.pone.0289133), 2023-08-16

SHR cAMP

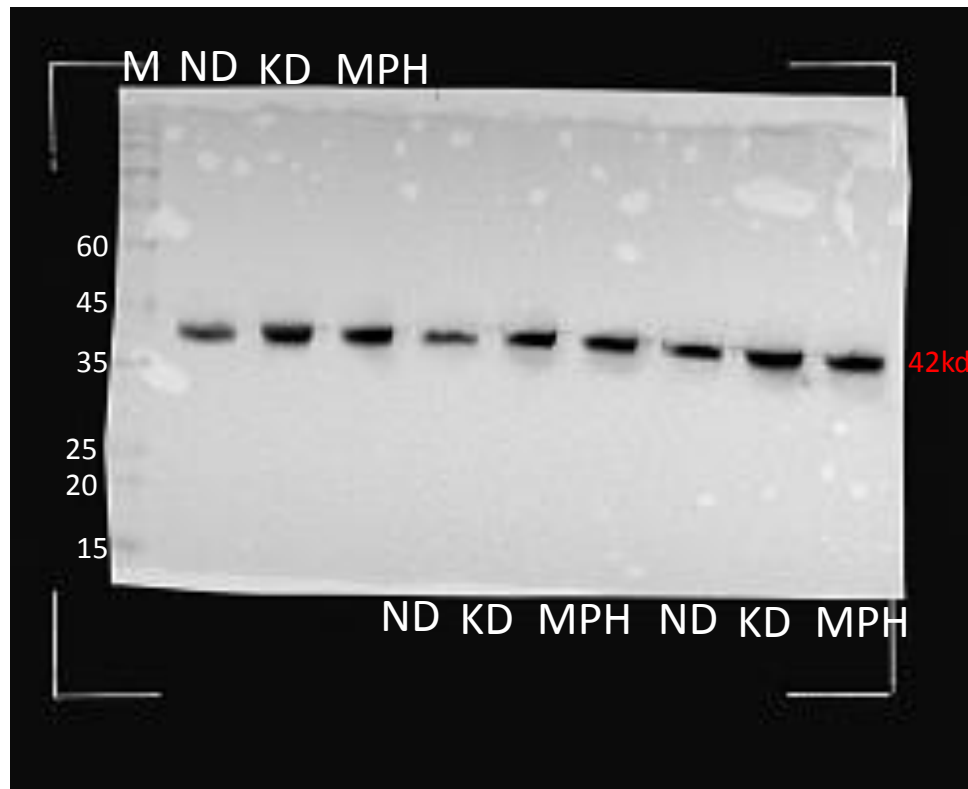

WKY cAMP

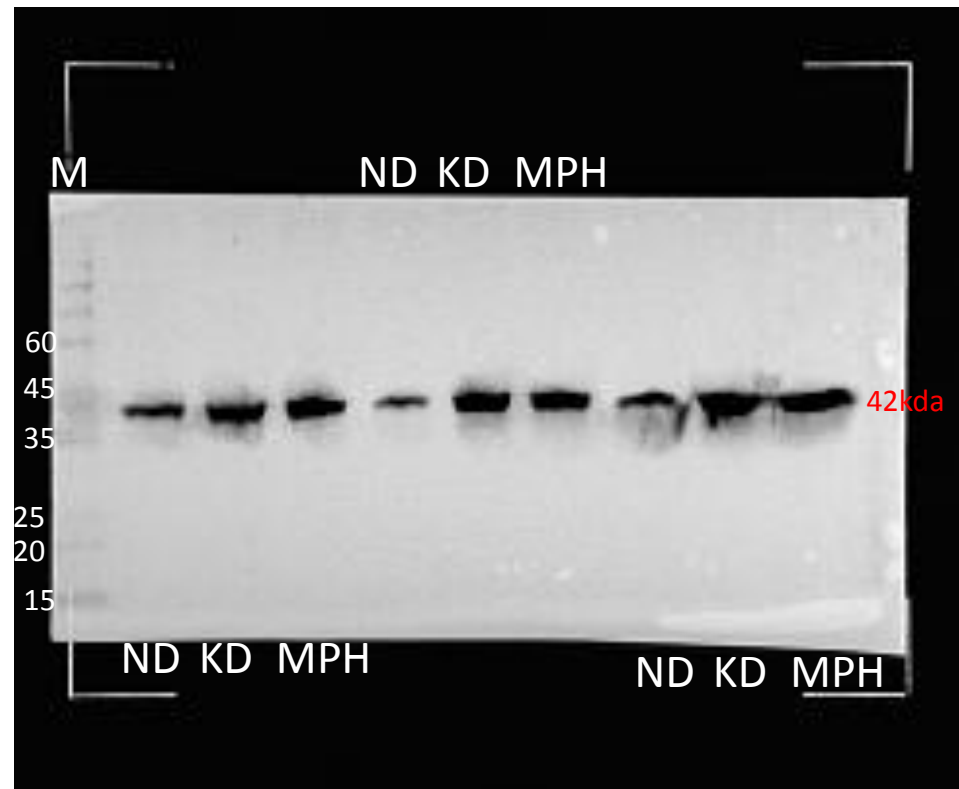

# SHR DARPP32

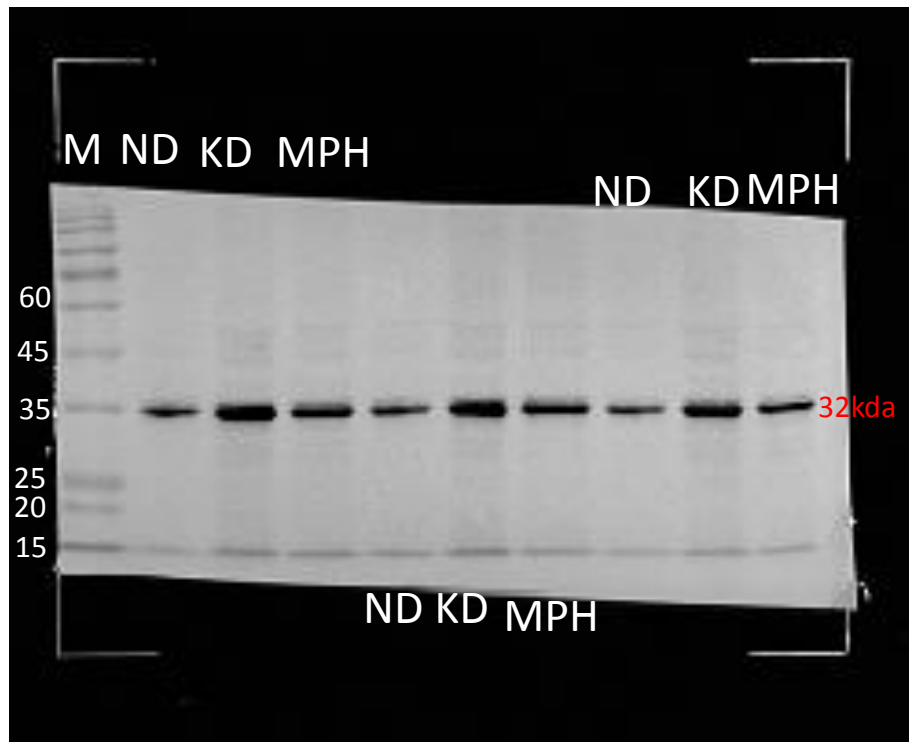

# WKY DARPP32

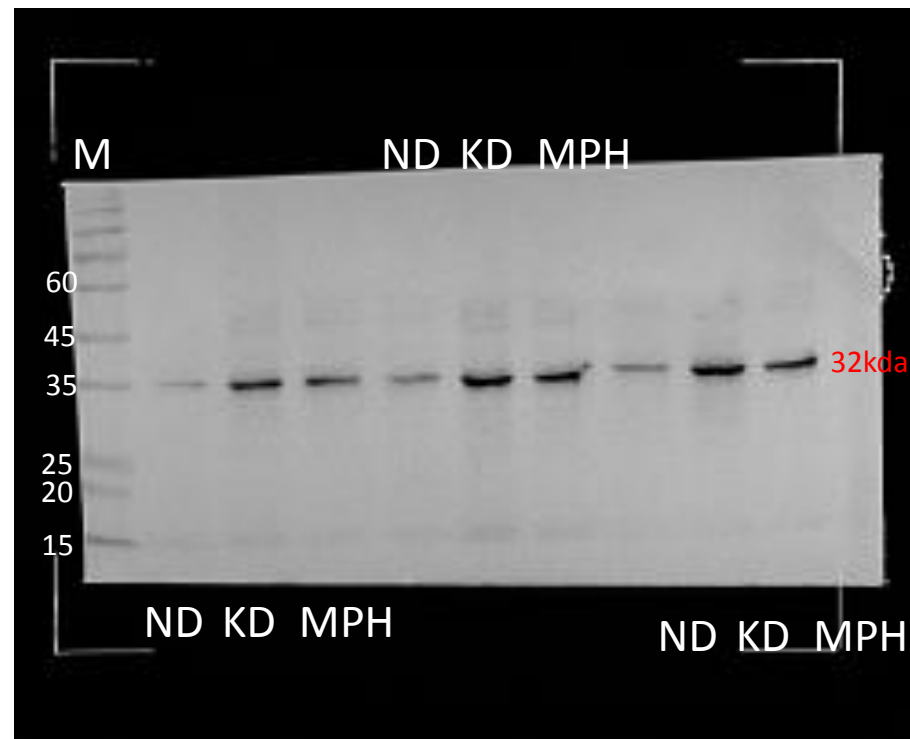

SHR DAT

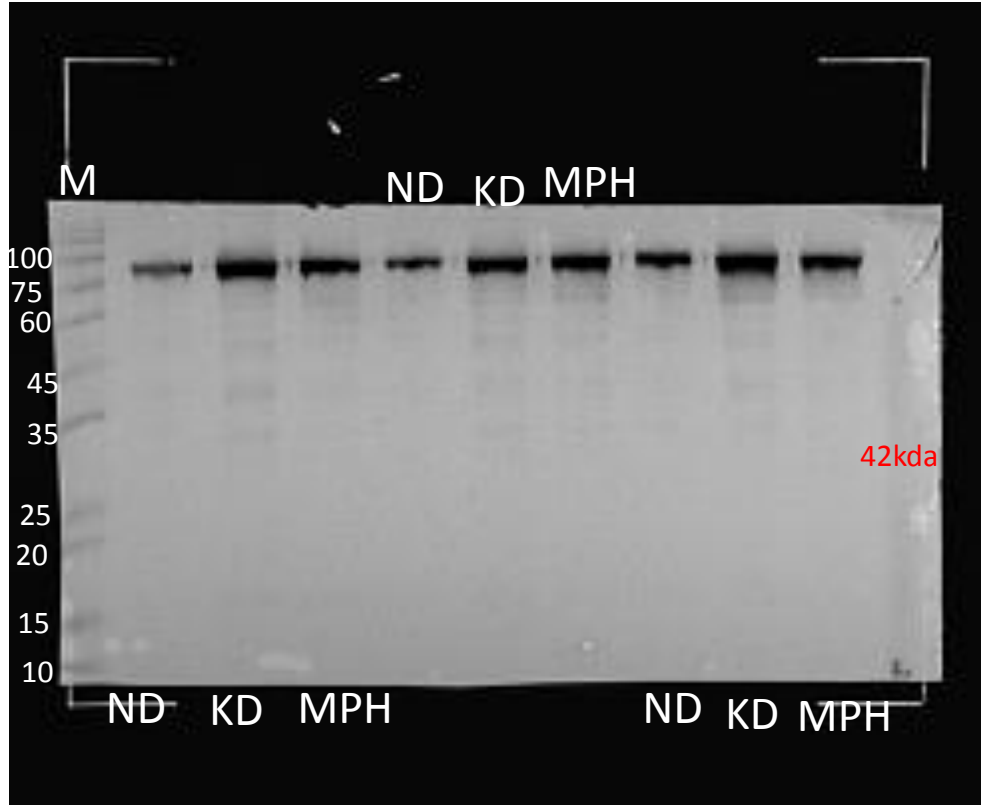

WKY DAT

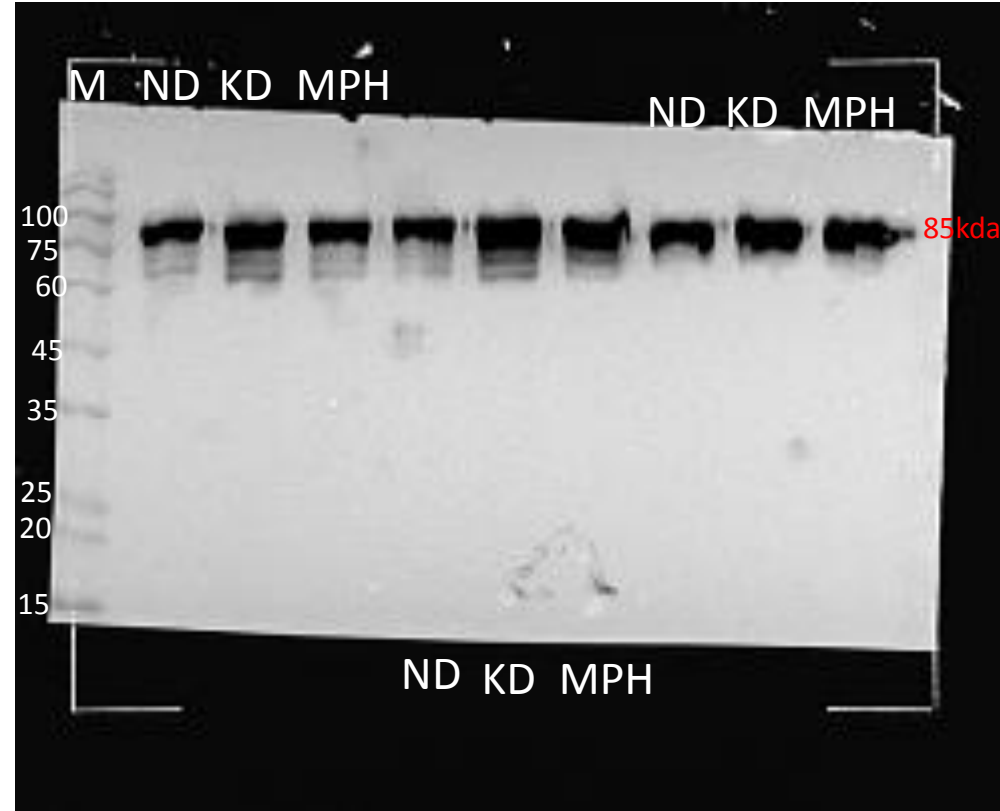

# SHR DRD1

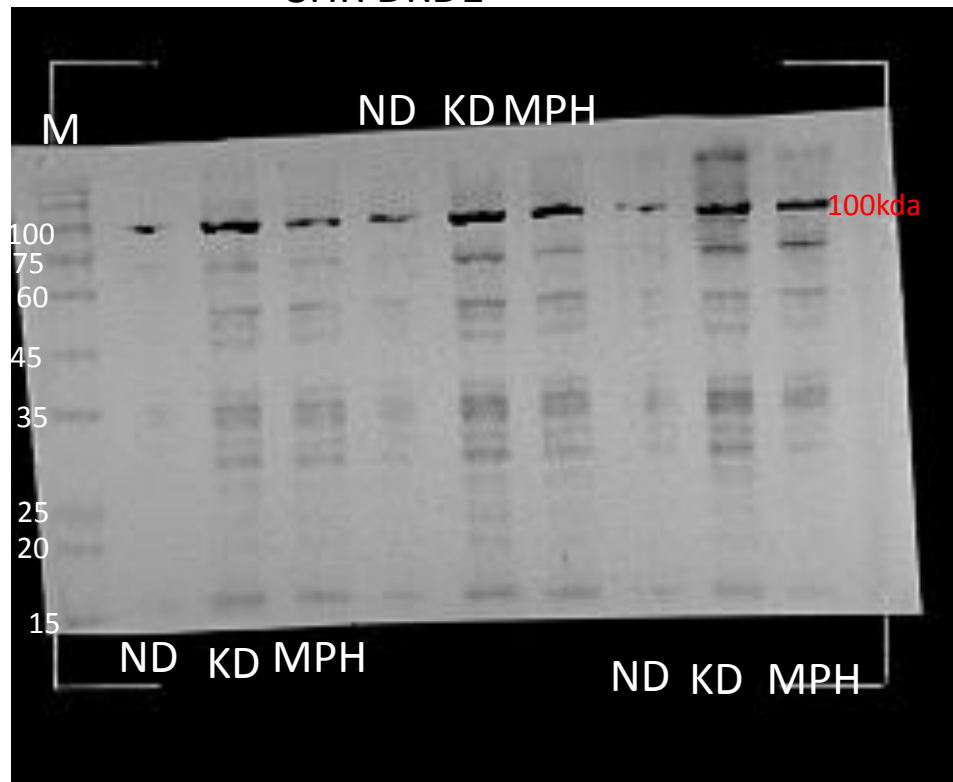

# WKY DRD1

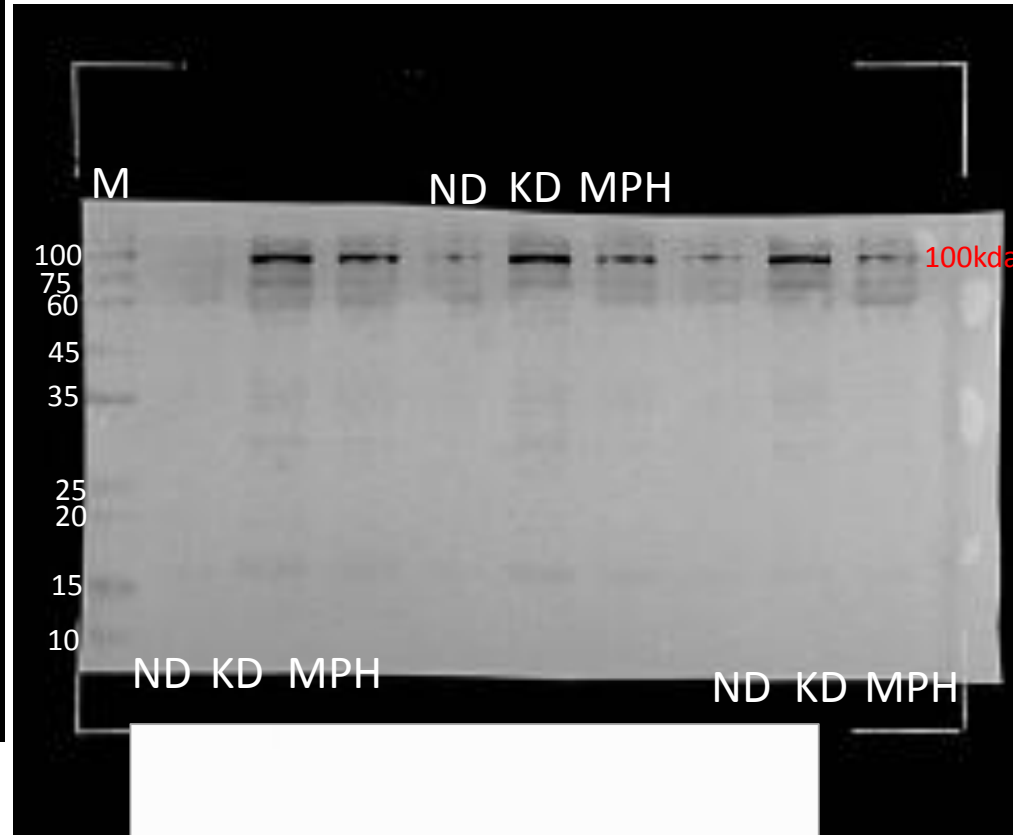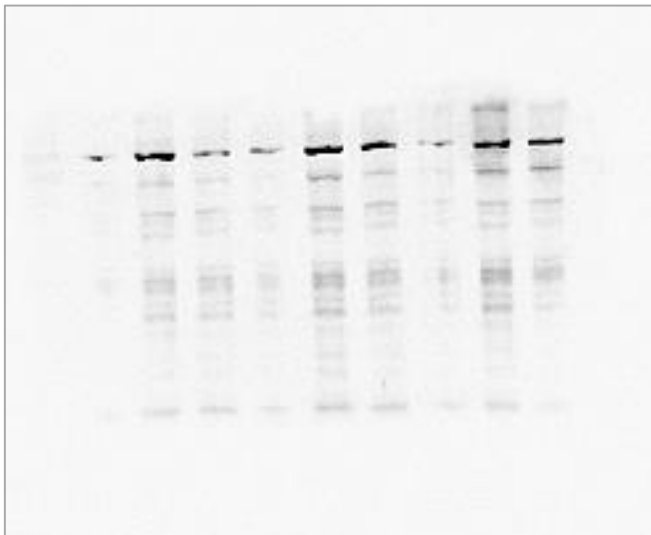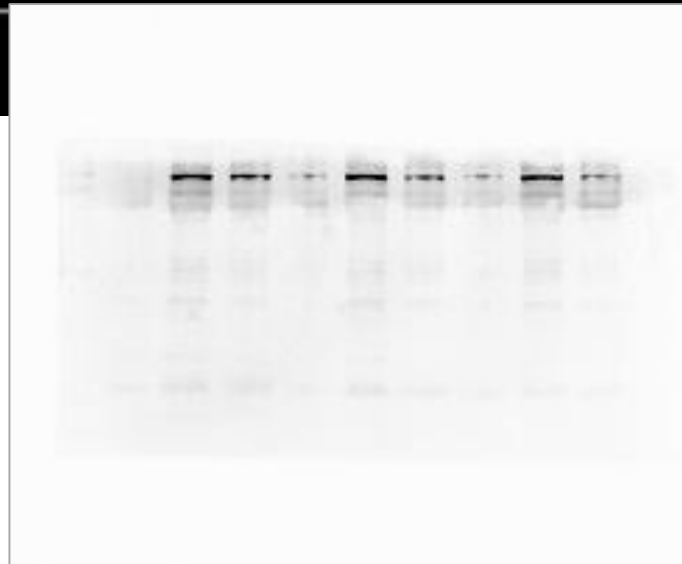

SHR PKA

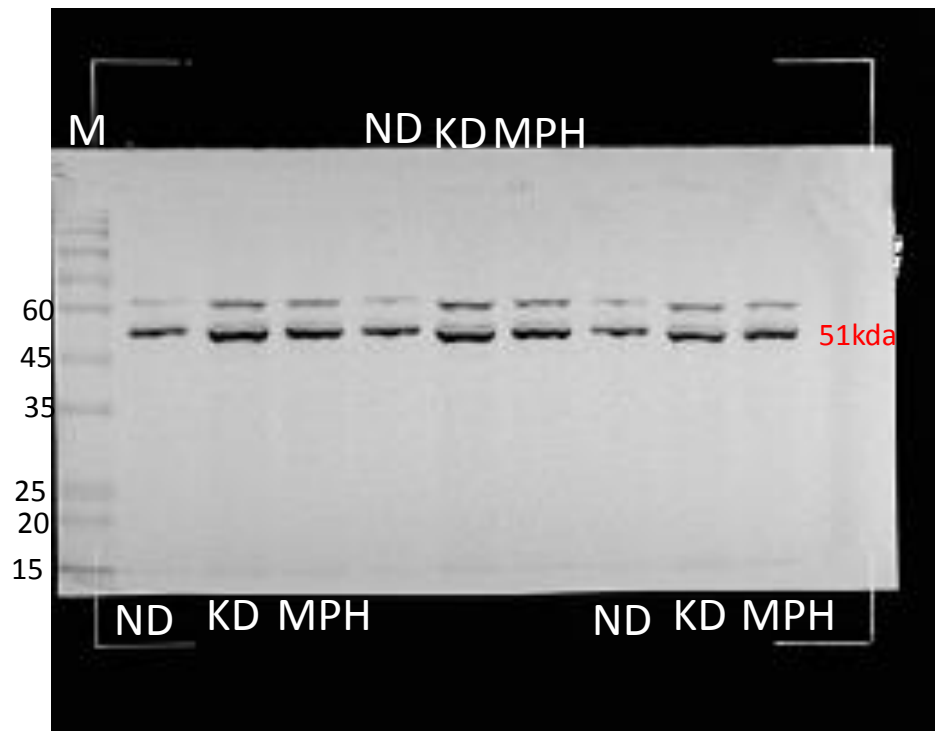

WKY PKA

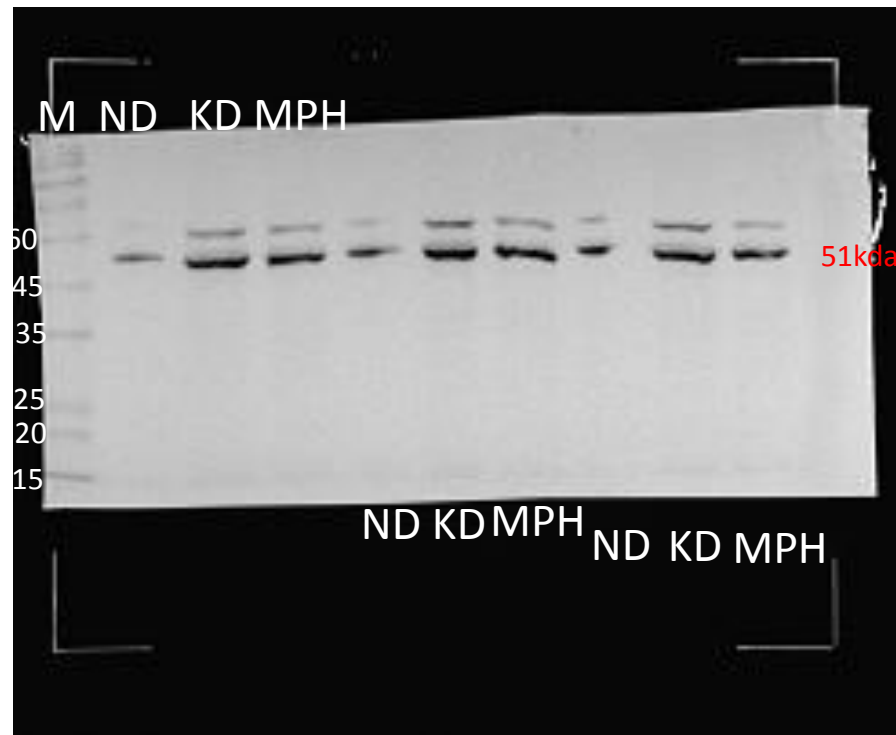

# SHR GAPDH

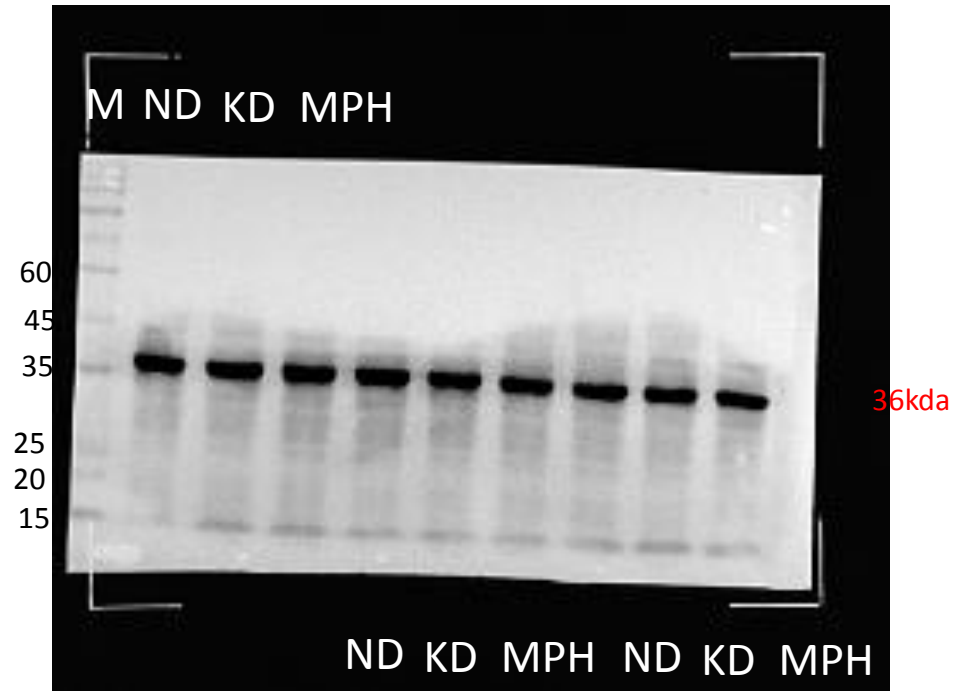

# WKY GAPDH

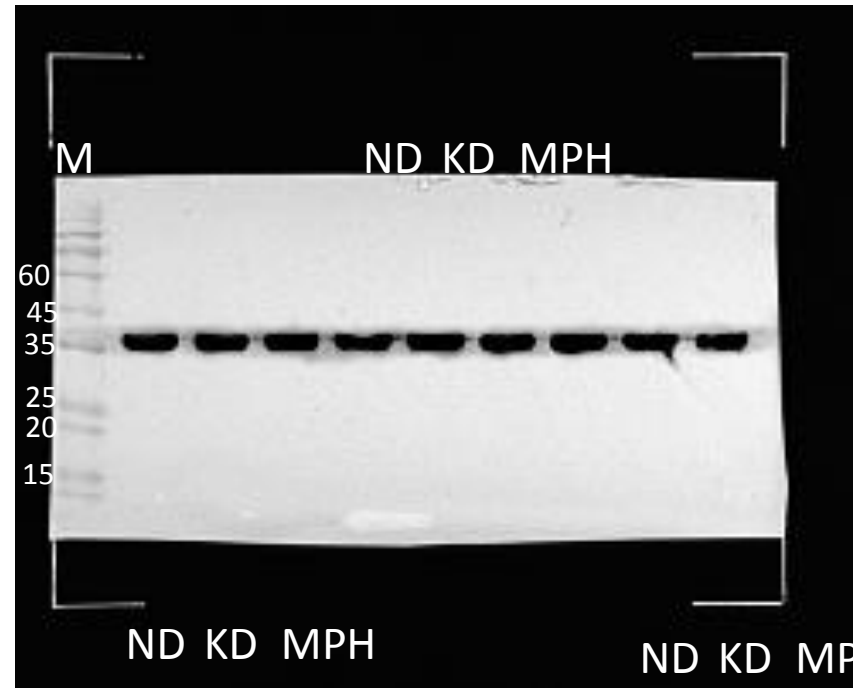

Supplement: pone.0289133.s004.pdf [file pone.0289133.s004.pdf]
